# Supplementary material for: De novo transcriptome characterization and gene expression profiling of the desiccation tolerant moss Bryum argenteum following rehydration
Source: PubMed Central journal article supplement (PMC4445806; doi:10.1186/s12864-015-1633-y), 2015-05-28
Supplement: 12864_2015_1633_MOESM1_ESM.pdf [file 12864_2015_1633_MOESM1_ESM.pdf]

## Supplementary Information for

*De novo* transcriptome characterization and gene expression profiling of the desiccation tolerant moss *Bryum argenteum* following rehydration

Bei Gao, Daoyuan Zhang\*, Xiaoshuang Li, Honglan Yang, Yuanming Zhang, Andrew J. Wood

### Supplementary Figures and Tables.

#### Supplemental Figures:

Figure S1: Distribution of Ortholog Hit Ratios, calculated on the *B. argenteum* TACs with a positive BLASTX hit with *P. patens*.

Figure S2: Venn diagram showing the BLASTX results of the *B. argenteum* TACs against four protein databases.

Figure S3: Species distribution of the top BLASTX hits obtained using the *B. argenteum* transcriptome.

Figure S4: Functional classifications of GO terms of *B. argenteum* TACs detected from Dry, R2 and R24.

Figure S5: Differentially expressed *B. argenteum* TACs after 24 hours rehydration of the photosynthesis metabolic pathway by KEGG annotation.

Figure S6: Differentially expressed *B. argenteum* TACs after 24 hours of rehydration of the photosynthesis – antenna proteins by KEGG annotation.

Figure S7: Differentially expressed *B. argenteum* TACs after 24 hours of rehydration of the ribosome proteins by KEGG annotation.

Figure S8: MapMan overview of *B. argenteum* cellular metabolism changes following rehydrating 2 hours (R2 v Dry).

Figure S9: MapMan overview of *B. argenteum* cellular metabolism changes between two rehydrated samples (R24 v R2).

Figure S10: Hierarchical cluster analyses of the putative early light induced proteins following rehydration.

#### Supplemental Tables:

Table S1: COG functional classification of *B. argenteum* TACs.

Table S2: Statistically over-representative GO-slim terms of rehydration up-regulated genes in R2 and R24.

Table S3: Primers used for quantitative real-time PCR (qRT-PCR) analysis.

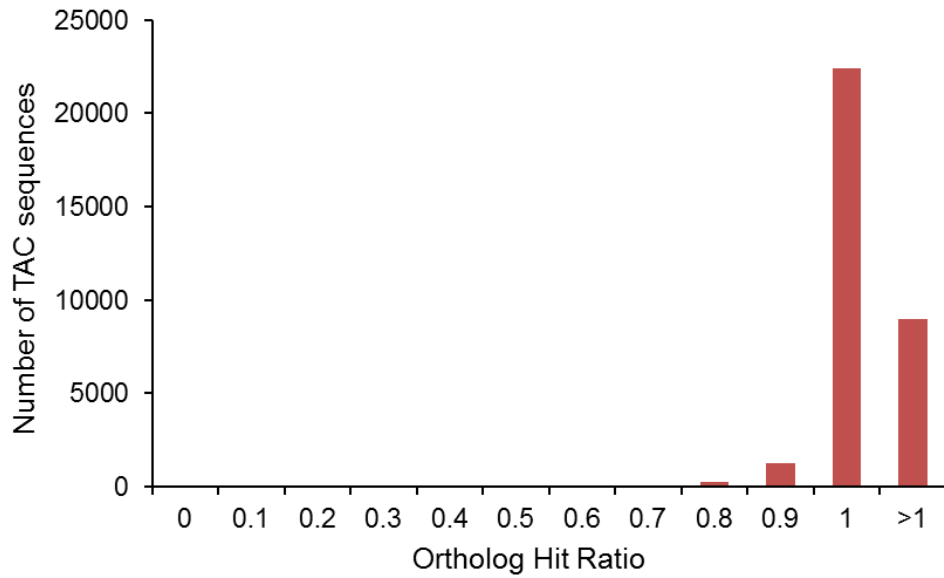

**Figure S1 – Ortholog Hit Ratio, calculated on the *B. argenteum* TACs with an positive BLASTX hit with *P. patens*.** The ratio of length between *B. argenteum* TACs and the *P. patens* orthologs derived from its genome is reported on the x-axis, the number of TACs observed in each ratio category is shown on the y-axis.

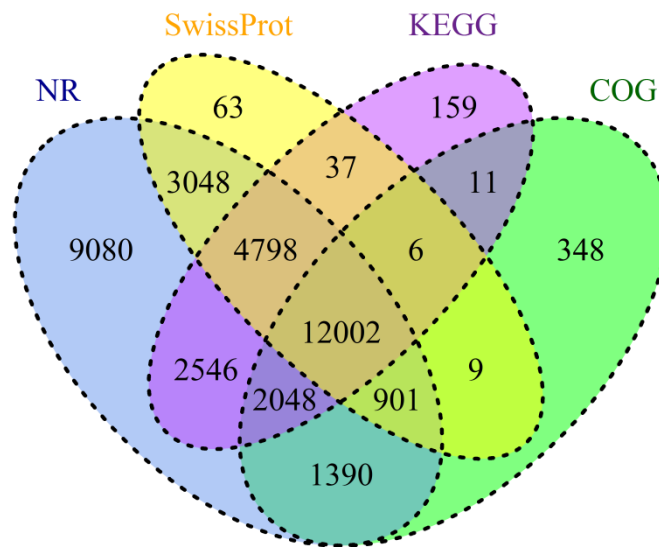

**Figure S2 – Venn diagram showing the BLASTX results of the *B. argenteum* transcriptome against four protein databases.**

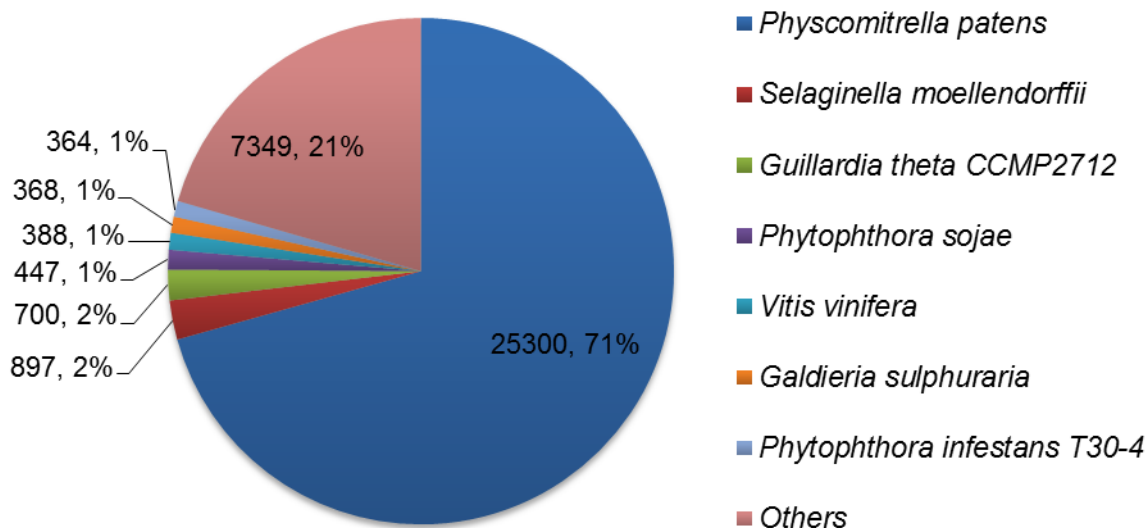

**Figure S3 – Species distribution of the top BLASTX hits obtained using the *B. argenteum* transcriptome.** Top scoring BLASTX hits against the NCBI-nr protein database are depicted. The number of BLAST hits per species is shown on the x-axis. The 7 most represented species with proportions of more than 1% are shown in this graph.

**Table S1 - COG functional classification of the *B. argenteum* transcript assembly contigs**

| Functional-Categories                                         | Code | TACs (n) |
|---------------------------------------------------------------|------|----------|
| RNA processing and modification                               | A    | 205      |
| Chromatin structure and dynamics                              | B    | 458      |
| Energy production and conversion                              | C    | 1167     |
| Cell cycle control, cell division, chromosome partitioning    | D    | 1406     |
| Amino acid transport and metabolism                           | E    | 1218     |
| Nucleotide transport and metabolism                           | F    | 313      |
| Carbohydrate transport and metabolism                         | G    | 1951     |
| Coenzyme transport and metabolism                             | H    | 619      |
| Lipid transport and metabolism                                | I    | 892      |
| Translation, ribosomal structure and biogenesis               | J    | 2413     |
| Transcription                                                 | K    | 2678     |
| Replication, recombination and repair                         | L    | 2540     |
| Cell wall/membrane/envelope biogenesis                        | M    | 1518     |
| Cell motility                                                 | N    | 366      |
| Posttranslational modification, protein turnover, chaperones  | O    | 2025     |
| Inorganic ion transport and metabolism                        | P    | 872      |
| Secondary metabolites biosynthesis, transport and catabolism  | Q    | 910      |
| General function prediction only                              | R    | 5271     |
| Function unknown                                              | S    | 1509     |
| Signal transduction mechanisms                                | T    | 2133     |
| Intracellular trafficking, secretion, and vesicular transport | U    | 1146     |
| Defense mechanisms                                            | V    | 343      |
| Extracellular structures                                      | W    | 61       |
| Nuclear structure                                             | Y    | 18       |
| Cytoskeleton                                                  | Z    | 503      |

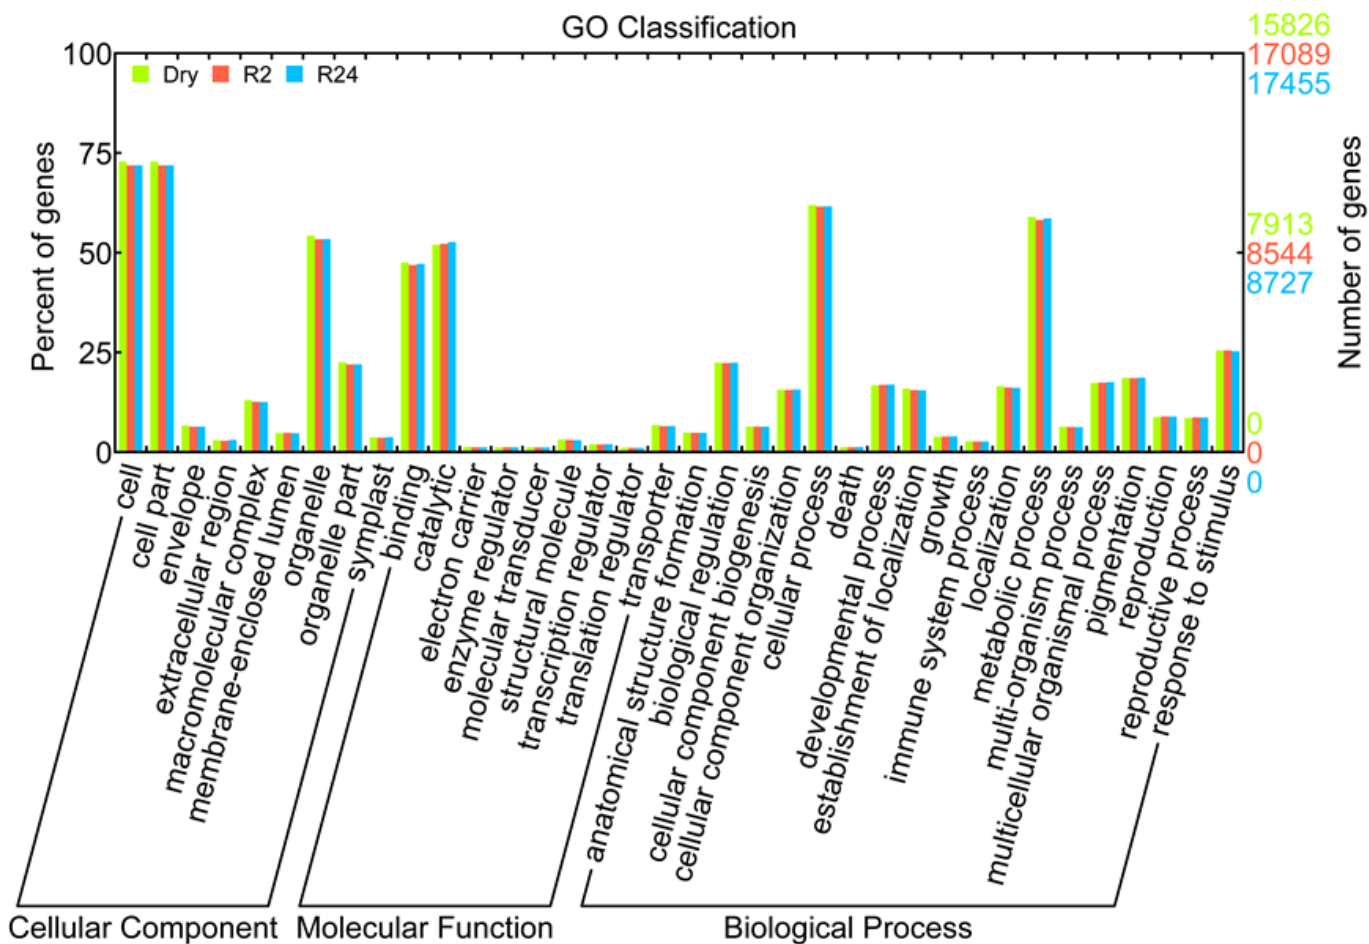

**Figure S4 – Functional classifications of GO terms of *B. argenteum* TACs detected from Dry, R2 and R24.**

**Table S2 - Statistically over-representative GO-slim terms of rehydration up-regulated genes in R2 and R24**

| GO ID | Description                                    | Total             | Up-regulated DEGs in R24 |          | Up-regulated DEGs in R24 |          |
|-------|------------------------------------------------|-------------------|--------------------------|----------|--------------------------|----------|
|       |                                                |                   | Frequency                | P-value* | Frequency                | P-value  |
| 9536  | plastid                                        | 4470/23509 19.0%  | 1055/3089 34.1%          | 0.00E+00 | --                       | --       |
| 9579  | thylakoid                                      | 628/23509 2.6%    | 269/3089 8.7%            | 3.24E-76 | --                       | --       |
| 15979 | photosynthesis                                 | 436/23509 1.8%    | 197/3089 6.3%            | 4.45E-60 | --                       | --       |
| 5737  | cytoplasm                                      | 11552/23509 49.1% | 1831/3089 59.2%          | 1.29E-32 | --                       | --       |
| 6091  | generation of precursor metabolites and energy | 835/23509 3.5%    | 237/3089 7.6%            | 2.72E-31 | --                       | --       |
| 5840  | ribosome                                       | 646/23509 2.7%    | 184/3089 5.9%            | 1.94E-24 | 93/1552 5.9%             | 7.71E-11 |
| 9058  | biosynthetic process                           | 5360/23509 22.7%  | 936/3089 30.3%           | 2.91E-24 | --                       | --       |
| 6412  | translation                                    | 875/23509 3.7%    | 212/3089 6.8%            | 1.07E-18 | 94/1552 6.0%             | 2.30E-05 |
| 5622  | intracellular                                  | 14586/23509 62.0% | 2132/3089 69.0%          | 2.60E-17 | --                       | --       |
| 5623  | cell                                           | 15753/23509 67.0% | 2264/3089 73.2%          | 3.20E-15 | --                       | --       |
| 5198  | structural molecule activity                   | 629/23509 2.6%    | 154/3089 4.9%            | 3.83E-14 | --                       | --       |
| 9987  | cellular process                               | 14567/23509 61.9% | 2095/3089 67.8%          | 1.68E-12 | --                       | --       |
| 5975  | carbohydrate metabolic process                 | 2321/23509 9.8%   | 406/3089 13.1%           | 1.24E-09 | --                       | --       |
| 16043 | cellular component organization                | 3920/23509 16.6%  | 638/3089 20.6%           | 1.98E-09 | --                       | --       |

|       |                                                     |                   |                 |          |                |          |
|-------|-----------------------------------------------------|-------------------|-----------------|----------|----------------|----------|
| 6139  | nucleobase-containing compound<br>metabolic process | 4459/23509 18.9%  | 714/3089 23.1%  | 2.35E-09 | --             | --       |
| 5618  | cell wall                                           | 590/23509 2.5%    | 129/3089 4.1%   | 1.36E-08 | 74/1552 4.7%   | 1.42E-06 |
| 9607  | response to biotic stimulus                         | 1084/23509 4.6%   | 209/3089 6.7%   | 2.11E-08 | --             | --       |
| 30312 | external encapsulating structure                    | 596/23509 2.5%    | 129/3089 4.1%   | 2.33E-08 | 74/1552 4.7%   | 1.78E-06 |
| 5576  | extracellular region                                | 698/23509 2.9%    | 146/3089 4.7%   | 2.38E-08 | --             | --       |
| 8152  | metabolic process                                   | 16060/23509 68.3% | 2243/3089 72.6% | 6.70E-08 | --             | --       |
| 6629  | lipid metabolic process                             | 1685/23509 7.1%   | 296/3089 9.5%   | 1.98E-07 | --             | --       |
| 5575  | cellular_component                                  | 16989/23509 72.2% | 2355/3089 76.2% | 1.98E-07 | --             | --       |
| 9628  | response to abiotic stimulus                        | 2717/23509 11.5%  | 446/3089 14.4%  | 3.97E-07 | 247/1552 15.9% | 1.42E-06 |
| 5829  | cytosol                                             | 2530/23509 10.7%  | 415/3089 13.4%  | 1.25E-06 | 250/1552 16.1% | 8.74E-10 |
| 9056  | catabolic process                                   | 3172/23509 13.4%  | 505/3089 16.3%  | 2.32E-06 | 244/1552 15.7% | 3.78E-02 |
| 9719  | response to endogenous stimulus                     | 1128/23509 4.7%   | 202/3089 6.5%   | 6.82E-06 | 106/1552 6.8%  | 1.29E-03 |
| 9605  | response to external stimulus                       | 1606/23509 6.8%   | 271/3089 8.7%   | 1.79E-05 | --             | --       |
| 3723  | RNA binding                                         | 889/23509 3.7%    | 161/3089 5.2%   | 3.73E-05 | --             | --       |
| 5488  | binding                                             | 11293/23509 48.0% | 1591/3089 51.5% | 6.10E-05 | --             | --       |
| 6950  | response to stress                                  | 3624/23509 15.4%  | 552/3089 17.8%  | 1.15E-04 | 316/1552 20.3% | 1.28E-06 |
| 19725 | cellular homeostasis                                | 296/23509 1.2%    | 61/3089 1.9%    | 6.36E-04 | --             | --       |
| 5515  | protein binding                                     | 2111/23509 8.9%   | 328/3089 10.6%  | 1.31E-03 | --             | --       |
| 7275  | multicellular organismal<br>development             | 3435/23509 14.6%  | 513/3089 16.6%  | 1.38E-03 | --             | --       |
| 16020 | membrane                                            | 6854/23509 29.1%  | 974/3089 31.5%  | 2.84E-03 | --             | --       |
| 9790  | embryo development                                  | 759/23509 3.2%    | 128/3089 4.1%   | 4.33E-03 | --             | --       |
| 19538 | protein metabolic process                           | 5163/23509 21.9%  | 742/3089 24.0%  | 4.53E-03 | --             | --       |
| 19748 | secondary metabolic process                         | 416/23509 1.7%    | 75/3089 2.4%    | 6.53E-03 | 41/1552 2.6%   | 4.79E-02 |
| 5739  | mitochondrion                                       | 2496/23509 10.6%  | 373/3089 12.0%  | 7.24E-03 | --             | --       |
| 9908  | flower development                                  | 577/23509 2.4%    | 97/3089 3.1%    | 1.45E-02 | --             | --       |
| 8150  | biological_process                                  | 20035/23509 85.2% | 2677/3089 86.6% | 1.81E-02 | --             | --       |
| 5730  | nucleolus                                           | 603/23509 2.5%    | 100/3089 3.2%   | 1.81E-02 | 71/1552 4.5%   | 2.00E-05 |
| 9791  | post-embryonic development                          | 1998/23509 8.4%   | 298/3089 9.6%   | 1.87E-02 | --             | -        |
| 166   | nucleotide binding                                  | 4825/23509 20.5%  | 683/3089 22.1%  | 2.29E-02 | --             | -        |
| 19825 | oxygen binding                                      | 20/23509 0.0%     | 7/3089 0.2%     | 2.31E-02 | --             | -        |
| 9653  | Anatomical structure morphogenesis                  | 1521/23509 6.4%   | 228/3089 7.3%   | 3.34E-02 | --             | -        |
| 5773  | vacuole                                             | 1198/23509 5.0%   | --              | --       | 118/1552 7.6%  | 7.56E-05 |
| 5886  | plasma membrane                                     | 2853/23509 12.1%  | --              | --       | 231/1552 14.8% | 3.91E-03 |

\*The P-value shown in the table was FDR corrected in BiNGO.

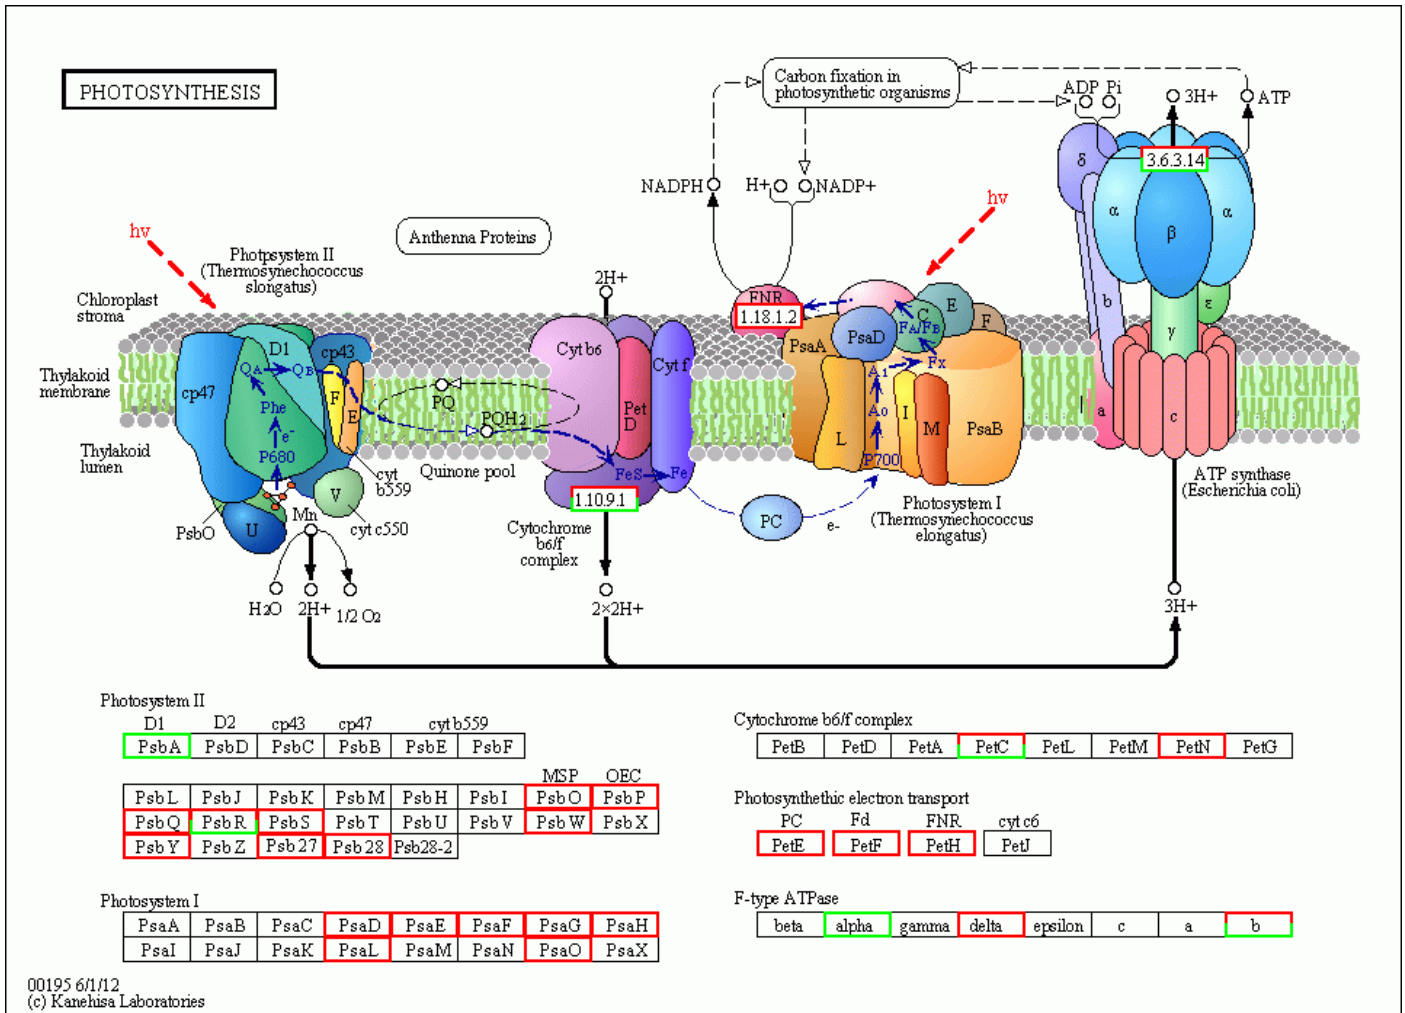

**Figure S5 – Differentially expressed *B. argenteum* TACs after 24 hours rehydration of the photosynthesis metabolic pathway by KEGG annotation. Up-regulated TACs for each protein family were colored as red, and green for down-regulated TACs.**

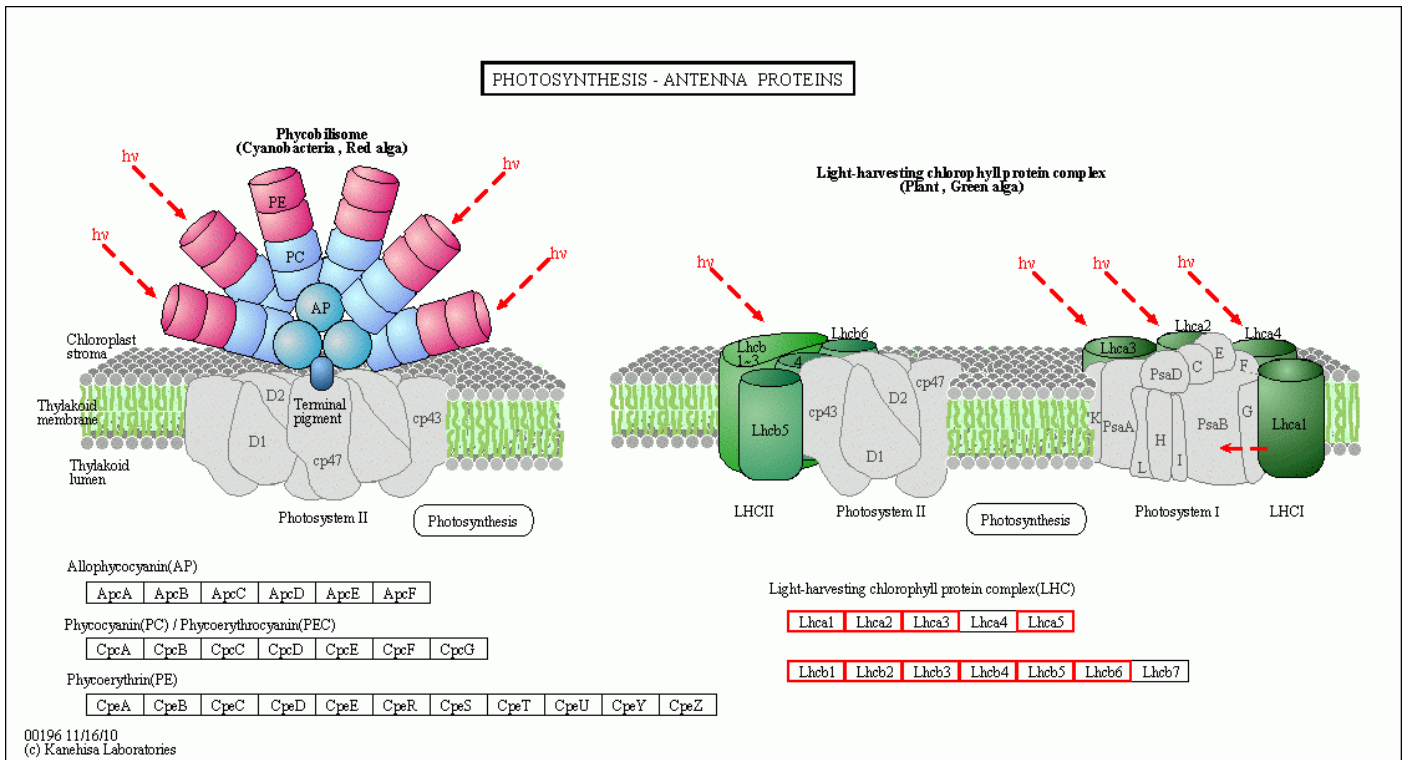

**Figure S6 – Differentially expressed *B. argenteum* TACs after 24 hours of rehydration of the photosynthesis – antenna proteins by KEGG annotation.** Up-regulated TACs for each protein family were colored as red, and green for down-regulated TACs.

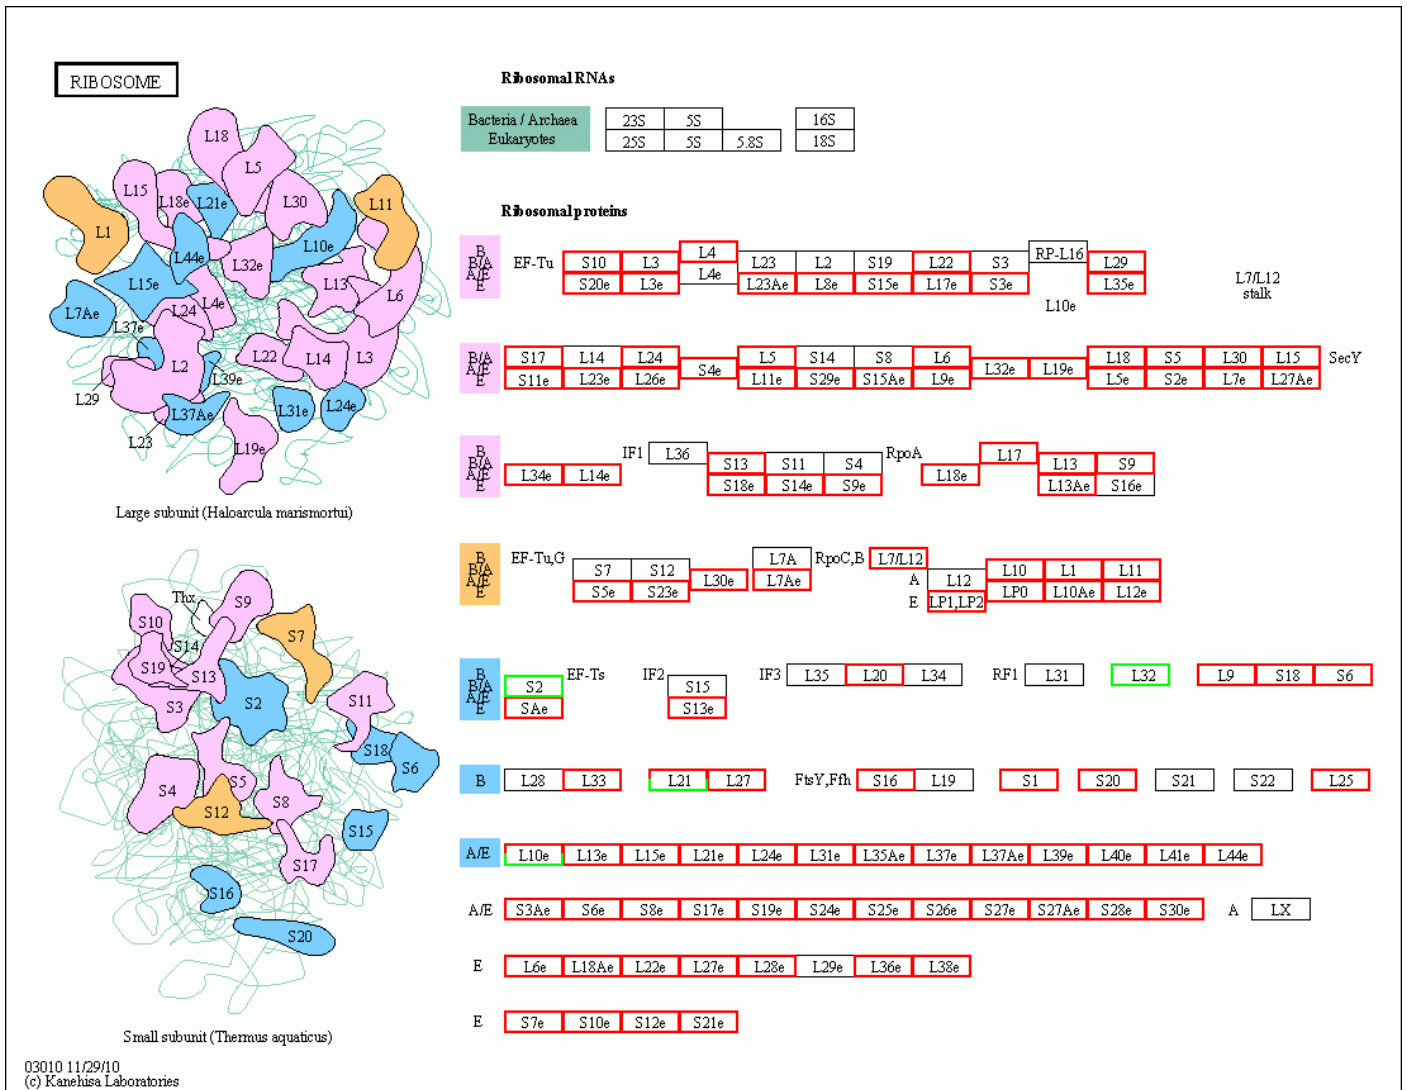

**Figure S7 – Differentially expressed *B. argenteum* TACs after 24 hours of rehydration of the ribosome proteins by KEGG annotation. Up-regulated TACs for each protein family were colored as red, and green for down-regulated TACs.**



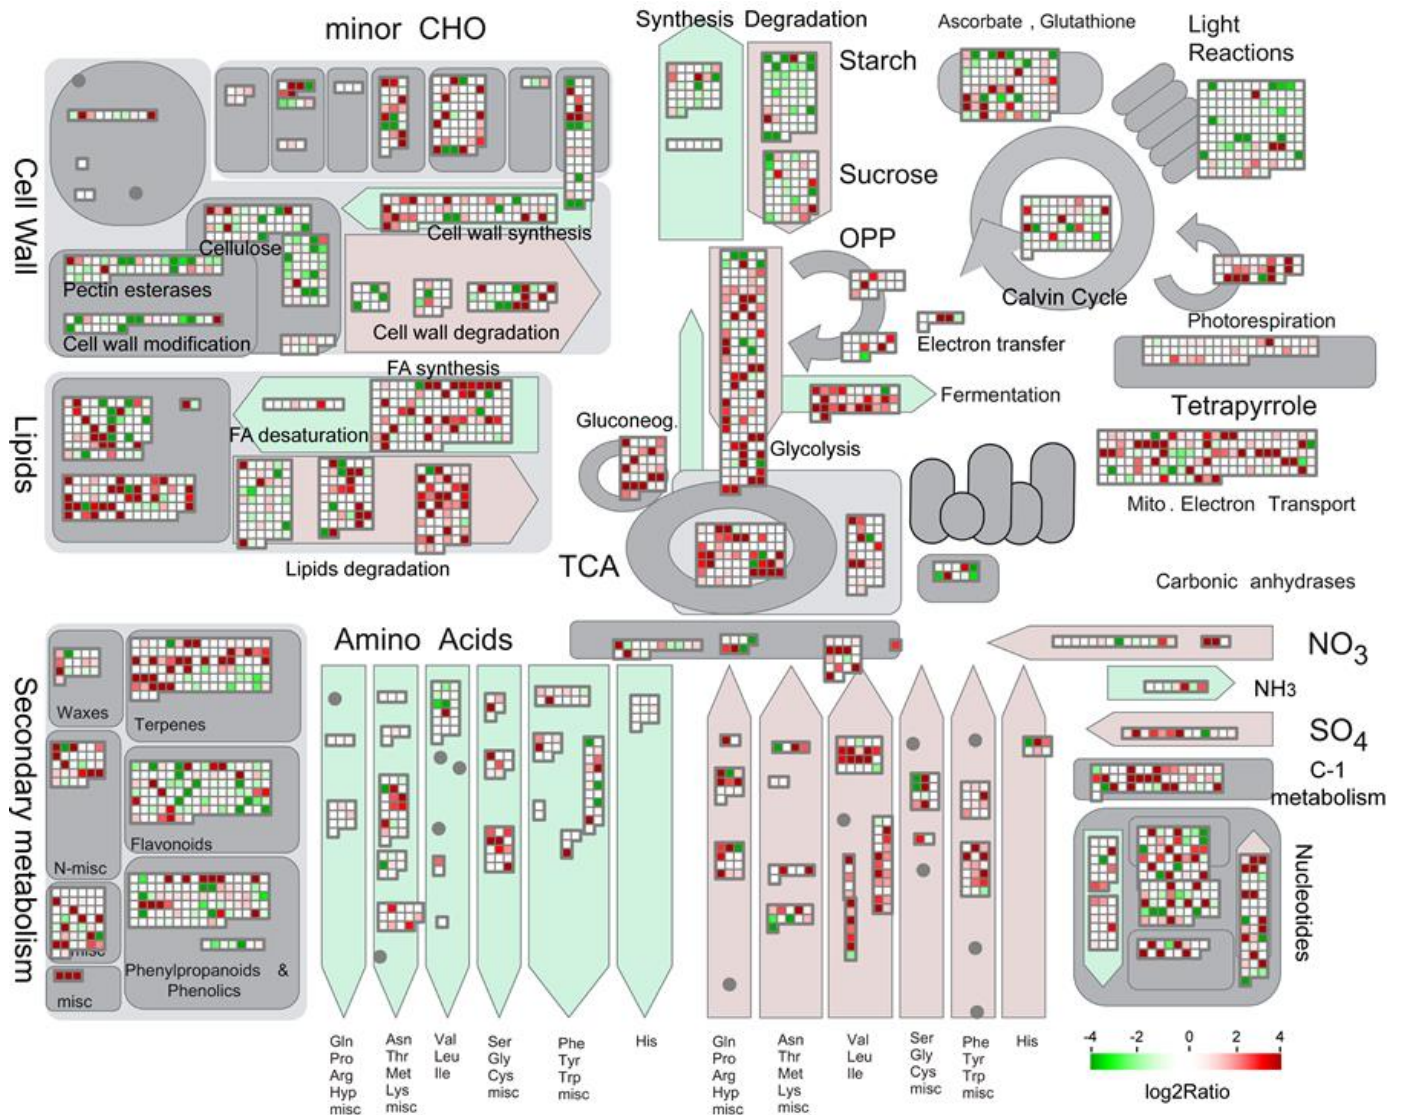

**Figure S8 - MapMan overview of *B. argenteum* cellular metabolism changes following rehydrating 2 hours (R2 v Dry).** Individual TACs are represented by colored squares. The color code scale is based on the log<sub>2</sub> of the fold change values of each TAC. Green squares represent the down-regulated TACs, while the reds are up-regulated TACs.

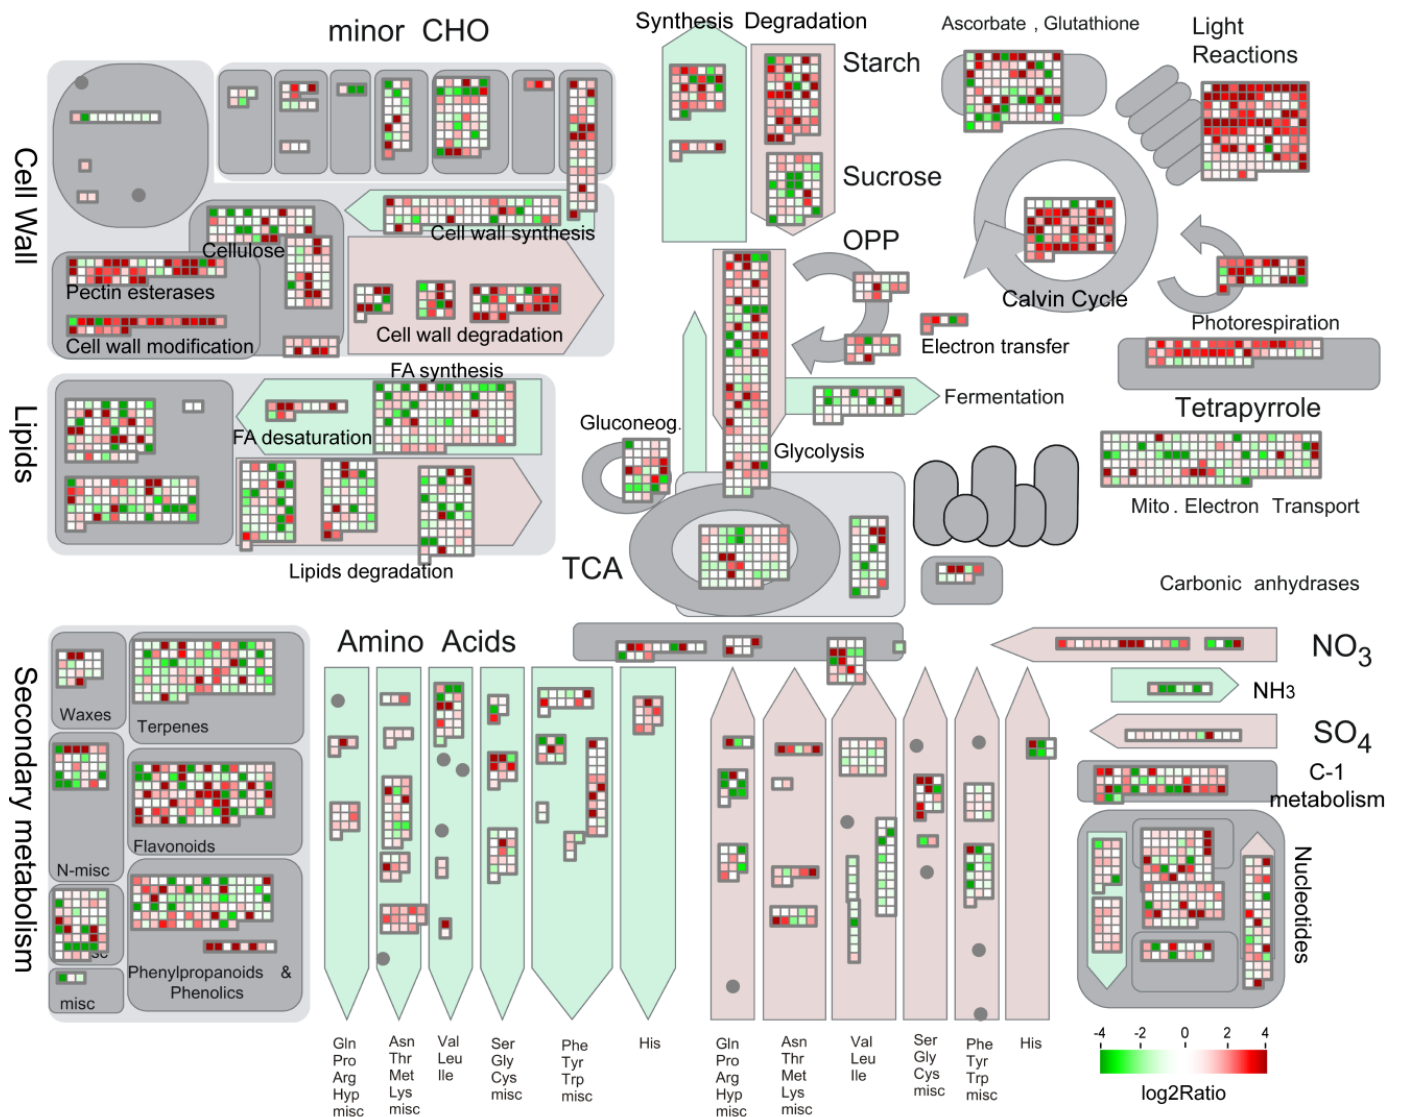

**Figure S9 - MapMan overview of *B. argenteum* cellular metabolism changes between two rehydrated samples (R24 v R2).** Individual TACs are represented by colored squares. The color code scale is based on the log<sub>2</sub> of the fold change values of each TAC. Green squares represent the down-regulated TACs, while the reds are up-regulated TACs.

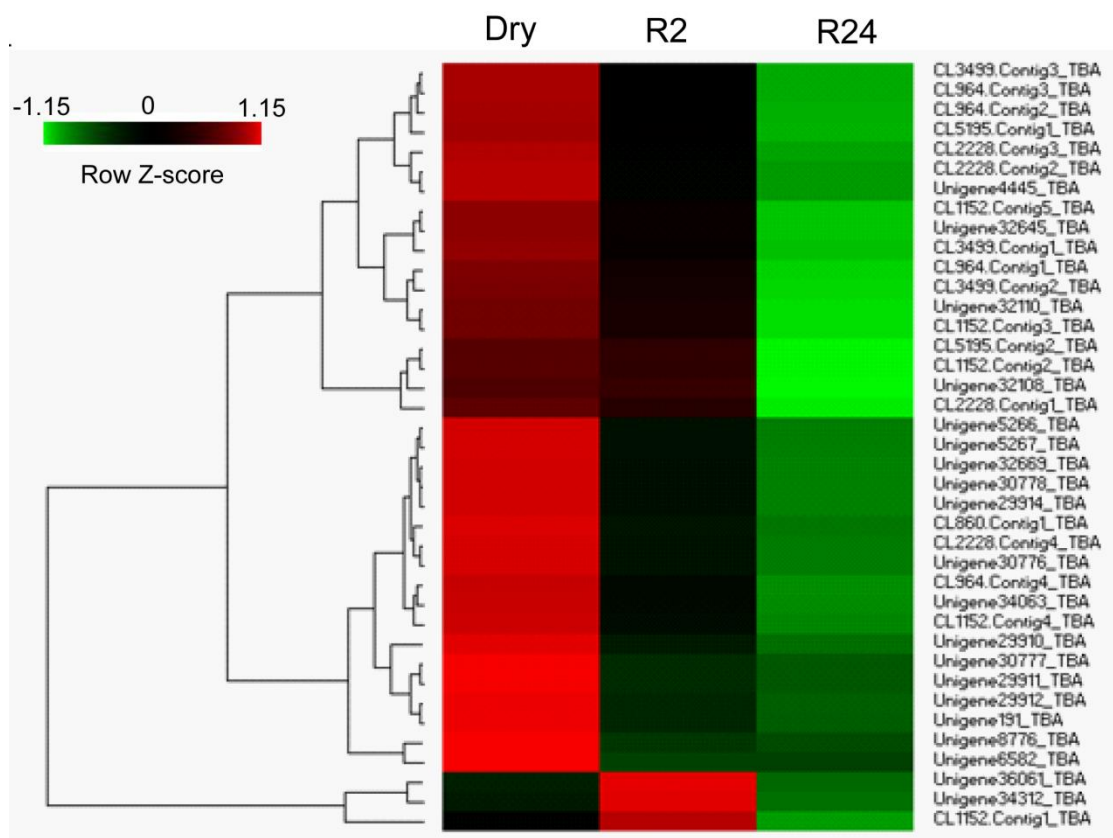

**Figure S10 - Hierarchical cluster analyses of the putative early light induced proteins following rehydration.** Putative Elips were identified from the transcriptome annotation, each column represents an experimental sample (i.e. Dry, R2 and R24) and each row represents a *B. argenteum* TAC. Expression differences are depicted as normalized Z-scores for each row and shown in different colors, red means high expression and green means low expression.

**Table - S3 Primers used for quantitative real-time PCR (qRT-PCR) analysis**

| Unigene ID         | Description                                 | Primer pairs                                        |
|--------------------|---------------------------------------------|-----------------------------------------------------|
| CL1684.Contig2_TBA | Heat shock protein 70                       | S: CCAGGGCAACCGTATCAC<br>A: CTTCTGCTCGCCATCCTT      |
| Unigene32542_TBA   | ALDH21                                      | S: TCTGGGAAGCCTATCAAAG<br>A: CCAATCGGAAACTTTCTAAC   |
| Unigene32354_TBA   | ERF transcription factor                    | S: AGATTGCGCCGTTCTGTC AAG<br>A: GCGGGTCGGTAATATGCTC |
| Unigene1001_TBA    | NAC transcription                           | S: GGAGAAGGGATACTGGAAAG<br>A: CCGTTGTAGTGACTGGGAC   |
| Unigene26688_TBA   | GRAS transcription factor,<br>DELLA protein | S: GCACGAGAAACTGAACC<br>A: TCTGCTGGCGAAGTAG         |
| Unigene25300_TBA   | Nin-like transcription factor               | S: ACTCCATTTACCCTCACC<br>A: TCCGCTATACCTAACCTG      |
| CL2407.Contig1_TBA | TrDr3 homolog                               | S: ATTGTGGTGCCGCTCTTT<br>A: AGCATCGTGGGATTAGGAAC    |
| CL233.Contig1_TBA  | Rehydrin, Tr288 homolog                     | S: ACGGAGCAGTTCCATTAG                               |

|                           |                                    |                                                                          |
|---------------------------|------------------------------------|--------------------------------------------------------------------------|
| <b>Unigene32501_TBA</b>   | Rehydrin, Tr155 homolog            | A: AGCGTCTTTCGCCTTGT<br>S: TTACAGCGTCGCCACTCCT<br>A: GCCATTGCCTGCGTTCTCA |
| <b>Unigene32407_TBA</b>   | Dehydrin, LEA protein              | S: CTCGTGAGCAGACCCAGTT<br>A: GCAAGGCACAGTCTCAACG                         |
| <b>Unigene31763_TBA</b>   | AP2 transcription factor           | S: CATAATGGTTCGGTGGGAAGC<br>A: TGCCGTTGTAAGTCTTTGCTG                     |
| <b>Unigene5266_TBA</b>    | ELIPa, Early light induced protein | S: TCTGTCAAGGCTATTGCTGG<br>A: TCTGGCTCACGCTTCGTAC                        |
| <b>CL1148.Contig1_TBA</b> | Actin*                             | S: GAGCGGTCTTTCCGAGTAT<br>A: CCAATGTCGTCCCAATTAGTC                       |
| <b>CL504.Contig8_TBA</b>  | Tubulin*                           | S: ATCACGGAGTTCCAGACCAA<br>A: CCACTGCCGCATTACAT                          |

\*used as internal reference gene.
